# Supplementary material for: Embedding SiO2into graphene oxide in situ to generate 3D hierarchical porous graphene laminates for high performance lithium–sulfur batteries
Source: Royal Society of Chemistry journal article supplement (doi:10.1039/c5ra17813d), 2015-01-01
Supplement: c5ra17813d1.pdf [file c5ra17813d1.pdf]

# **In situ SiO<sub>2</sub> embedded into the graphene oxide to generate 3D hierarchical porous graphene laminates for high performance lithium-sulfur batteries**

Wangliang Wu,<sup>ab</sup> Chunying Wan,<sup>ab</sup> Chuxin Wu,<sup>ab</sup> and Lunhui Guan<sup>ab\*</sup>

a Key Laboratory of Design and Assembly of Functional Nanostructures, Chinese Academy of Sciences, Fuzhou, Fujian 350002, China Fax: +86-591-63173550; Tel: +86-591-63173550; E-mail: guanlh@fjirsm.ac.cn

b Fujian Key Laboratory of Nanomaterials, Fuzhou, Fujian 350002, China

## **1. Experimental section**

### **1.1. Materials synthesis**

All chemicals in experiment were of analytical grade and used as received.

Synthesis of 3D porous graphene laminates (GLs): Typically, a 50 ml GO (0.5 mg ml<sup>-1</sup>) aqueous solution was modified with poly(diallyldimethyl ammonium chloride) (PDDA) or polyelectrolyte poly(sodium 4-styrenesulfonate) (PSS) (0.4 mg ml<sup>-1</sup> in H<sub>2</sub>O) under ultrasonication for 30 minutes. The samples were respectively labelled as PDDA-GO and PSS-GO. Secondly, 0.5 ml tetraethylorthosilicate (TEOS) (or NH<sub>3</sub> H<sub>2</sub>O) was added into these modified GO aqueous solution under stirring for 10 minutes, respectively. Thirdly, PDDA-modified negatively charged GO solution was added dropwise into the PSS-modified negatively charged GO under vigorous stirring for 6 h. Then centrifuged and washed repeatedly with DI water and ethanol and dried at 60 °C for 12 h. Finally, the products were carbonized by heating sequentially in a tubular furnace at 800 °C for 2 h under Ar atmosphere; Silica was removed by immersing the composite in 10 wt % hydrofluoric acid solution under stirring for 24 h at room temperature.

Preparation of the C-S composite: The C-S composite was prepared via a facile melt-diffusion strategy. GO used here were produced by the modified Hummers method, as our previous report.<sup>1</sup> rGO was attained by heating at a heating rate of 10 K min<sup>-1</sup> in a tubular furnace at 800 °C for 2 h under Ar atmosphere. Typically, carbon material (GLs or rGO) and sulfur with weight ratios of 1:4 were dissolved in 5 ml CS<sub>2</sub> to form a homogeneous solution under ultrasonic radiation. Subsequently, CS<sub>2</sub> was allowed to completely evaporate from the solution under magnetic stir to obtain the C-S composite. The final C-S product was placed in a crucible, then heated to 155 °C with a slow heating rate of 0.5 °C min<sup>-1</sup> and kept at that temperature for 12 h in an argon environment. The products were denoted as GLs-S or rGO-S.

### **1.2. Materials Characterization**

The structure and morphology of composites were characterized by X-ray diffraction (XRD, RIGAKU SCXmini), scanning electron microscope (SEM, JSM-6700F), and transmission electron microscope (TEM, Tecnai G2 F20). Thermal gravimetric analysis (TGA, NETZSCH STA449 C) tests were measured from 30 to 600 °C at a heating rate of 10 K min<sup>-1</sup> in a N<sub>2</sub> environment to evaluate the weight content of sulfur in the composites. The nitrogen adsorption/desorption isotherms and the pore size distribution using the density functional theory (DFT) calculation were performed by an ASAP-2020 surface area analyzer.

### **1.3. Electrochemical measurements**

The electrochemical tests were performed via CR2025 coin-type test cells which were fabricated in an argon-filled glove box using lithium metal as the counter electrode and a Celgard 2300 membrane. The cathode slurry was prepared by mixing 80 wt% C-S composite, 10 wt% conducting carbon (ketjen black, KB), and 10 wt% polyvinylidene fluoride (PVDF) in N-methyl-2-pyrrolidone (NMP) solvent dispersant. Positive electrodes were produced by pasting the slurry on Ni foam with an average sulfur loading of  $1.1\sim 1.3\text{ mg cm}^{-2}$ , then drying at  $60\text{ }^{\circ}\text{C}$  for 12 h. The electrolyte solution was 1 M lithium bis(trifluoromethylsulfonyl)imide (LiTFSI) in a mixed solvent of 1,2-dimethoxy ethane (DME) and 1,3-dioxolane (DOL) (a volume ratio of 1 : 1) with 0.25 M lithium nitrate additive (LiNO<sub>3</sub>). The charge-discharge performance of the cells was tested with LAND CT-2001A instrument. The cut-off potentials were 1.9 and 2.7 V at room temperature. Cyclic voltammetry (CV) tests were performed on a Zennium Electrochemical Workstation. The cut-off potentials were 1.9 and 2.7 V at room temperature.

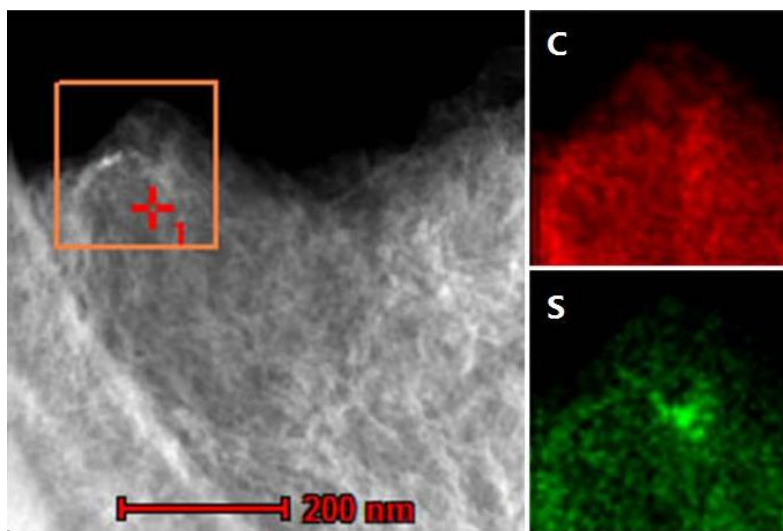

Fig. S1. Scanning transmission electron microscopy (STEM) image and the corresponding element mapping images of carbon and sulfur of the GLs-S composite.

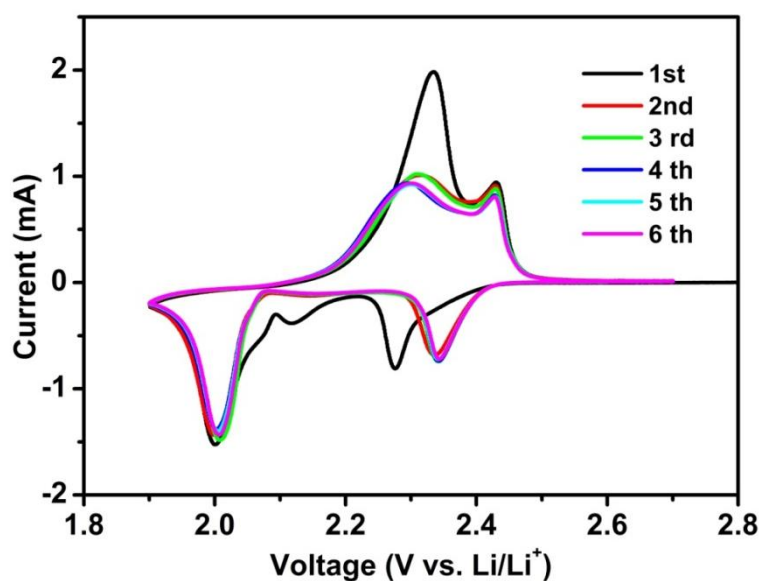

Fig. S2. CV curves of the GLs-S electrode at a scan rate of  $0.1\text{ mV s}^{-1}$ .

Table 1 Textural characteristic of samples

| <b>samples</b> | <b>BET</b>                         | <b>Pore Volume</b>                   |
|----------------|------------------------------------|--------------------------------------|
| <b>GLs</b>     | 771 m <sup>2</sup> g <sup>-1</sup> | 1.53 cm <sup>3</sup> g <sup>-1</sup> |
| <b>rGO</b>     | 252 m <sup>2</sup> g <sup>-1</sup> | 1.12 cm <sup>3</sup> g <sup>-1</sup> |
| <b>GLs-S</b>   | 29 m <sup>2</sup> g <sup>-1</sup>  | 0.1 cm <sup>3</sup> g <sup>-1</sup>  |
| <b>rGO-S</b>   | 29 m <sup>2</sup> g <sup>-1</sup>  | 0.1 cm <sup>3</sup> g <sup>-1</sup>  |

1. C. Wan, W. Wu, C. Wu, J. Xu and L. Guan, *RSC Adv.*, 2015, **5**, 5102-5106.
